# Supplementary material
Source: MDPI journal article supplement (https://www.mdpi.com/2071-1050/13/18/10449)
Supplement: s1 [file s1]

### **Supplementary Table Captions**

**Table S1.** Combined Pearson's correlation coefficients matrix for days to maturity, stem height, stem numbers and biomass yield.

**Table S2.** Combined Pearson's correlation coefficients matrix for moisture contents (MC), volatile matter (VM), fixed carbon (FC), ash, higher heating value (HHV), biomass yield (BY) and energy potential (E).

**Table S3.** Combined Pearson's correlation coefficients matrix for lignocellulosic components.

**Table S1.** Combined Pearson's correlation coefficients matrix for days to maturity, stem height, stem numbers and biomass yield.

| Traits        | Days to maturity | Stem numbers        | Stem height |
|---------------|------------------|---------------------|-------------|
| Stem numbers  | -0.327*          |                     |             |
| Stem height   | 0.690**          | 0.030 <sup>ns</sup> |             |
| Biomass yield | 0.779**          | 0.024 <sup>ns</sup> | 0.929**     |

\*\*\* = highly significant ( $p < 0.001$ ), \* = significant ( $p < 0.05$ ), ns = non-significant.

**Table S2.** Combined Pearson's correlation coefficients matrix for moisture contents (MC), volatile matter (VM), fixed carbon (FC), ash, higher heating value (HHV), biomass yield (BY) and energy potential (E).

| Components | MC                   | VM                    | FC                  | Ash                   | HHV                  | BY                   |
|------------|----------------------|-----------------------|---------------------|-----------------------|----------------------|----------------------|
| VM         | -0.181 <sup>ns</sup> |                       |                     |                       |                      |                      |
| FC         | -0.083 <sup>ns</sup> | 0.025 <sup>ns</sup>   |                     |                       |                      |                      |
| Ash        | -0.189 <sup>ns</sup> | -0.874 <sup>***</sup> | -0.326 <sup>*</sup> |                       |                      |                      |
| HHV        | -0.170 <sup>ns</sup> | 0.996 <sup>***</sup>  | 0.116 <sup>ns</sup> | -0.905 <sup>***</sup> |                      |                      |
| BY         | -0.117 <sup>ns</sup> | 0.592 <sup>***</sup>  | 0.328 <sup>*</sup>  | -0.618 <sup>***</sup> | 0.615 <sup>***</sup> |                      |
| E          | -0.117 <sup>ns</sup> | 0.603 <sup>***</sup>  | 0.325 <sup>*</sup>  | -0.627 <sup>***</sup> | 0.626 <sup>***</sup> | 0.999 <sup>***</sup> |

\*\*\* = highly significant ( $p < 0.001$ ), \* = significant ( $p < 0.05$ ), ns = non-significant.

**Table S3.** Combined Pearson's correlation coefficients matrix for lignocellulosic components.

| Components    | Cellulose | Hemicellulose       | Lignin    |
|---------------|-----------|---------------------|-----------|
| Hemicellulose | 0.385**   |                     |           |
| Lignin        | 0.583**   | 0.192 <sup>ns</sup> |           |
| Extractives   | -0.850*** | -0.806***           | -0.550*** |

\*\*\* = highly significant ( $p < 0.001$ ), \*\* = moderately significant ( $p < 0.01$ ),  
ns = non-significant.
